# Supplementary material for: Nitrile insertion into a boryl-substituted five-membered zirconacycloallenoid: unexpected formation of a zwitterionic boratirane product
Source: Royal Society of Chemistry journal article supplement (doi:10.1039/b915924j), 2009-01-01
Supplement: b915924j.pdf [file b915924j.pdf]

## Nitrile Insertion into a Boryl-substituted Five-membered Zirconacycloallene: Unexpected formation of a Zwitterionic Boratirane Product

Juri Ugolotti, Gerald Kehr, Roland Fröhlich, Stefan Grimme and Gerhard Erker

*Organisch-Chemisches Institut der Universität, Corrensstrasse 40, Münster, Germany. Fax:+49 251 8336503; Tel:+49 251 8333221; E-mail: erker@uni-muenster.de.*

### Supporting Information

**General Procedures.** Reactions with air- and moisture sensitive compounds were carried out under an argon atmosphere using Schlenk-type glassware or a glovebox. Solvents were dried with the procedure reported by *Grubbs* (Pangborn, A. B.; Giardello, M. A.; Grubbs, R. H.; Rosen, R. K.; Timmers, F. J. *Organometallics*, 1996, 15, 1518-1520) or, particularly deuterated solvents, were distilled from appropriate drying agents and stored under an argon atmosphere. The following instruments were used for physical characterization of the compounds: NMR: Varian Inova 500 ( $^1\text{H}$ : 500 MHz;  $^{11}\text{B}$ : 161 MHz;  $^{13}\text{C}$ : 126 MHz;  $^{19}\text{F}$ : 470 MHz;  $^{29}\text{Si}$ : 99 MHz {using INEPT pulse sequence based on  $J_{\text{Si,H}} = 7$  Hz}). Most NMR assignments were supported by additional 2D experiments. The IR spectra were obtained with a Varian 3100 FT-IR (EXCALIBUR Series) spectrometer, the MS GC-EI with Triplequad TSQ (Thermo-Finnigan-MAT, Bremen). Elemental analyses were performed with a Foss-Heraeus CHN-O-Rapid instrument.

X-ray Crystal Structure Analyses. Data sets was collected with a Nonius KappaCCD diffractometer, equipped with a rotating anode generator. Programs used: data collection COLLECT (Nonius B.V., 1998), data reduction Denzo-SMN (Z. Otwinowski, W. Minor, *Methods in Enzymology*, 1997, 276, 307-326), absorption correction Denzo (Z. Otwinowski, D. Borek, W. Majewski, W. Minor, *Acta Cryst.* 2003, A59, 228-234), structure solution SHELXS-97 (G.M. Sheldrick, *Acta Cryst.* 1990, A46, 467-473), structure refinement SHELXL-97 (G.M. Sheldrick, *Acta Cryst.* 2008, A64, 112-122), graphics SCHAKAL (E. Keller, Univ. Freiburg, 1997).

#### Preparation of complex 5a.

Complex **3a** (400 mg, 0.507 mmol) and acetonitrile (25 mg, 0.609 mmol, 20% excess) were placed in two different Schlenk flasks of 100 mL and 50 mL volume each, and dissolved by 30 and 5 mL dry toluene, respectively. The acetonitrile solution was added by cannula under argon to the zirconacycloallene solution

with stirring. The dark-red clear solution was stirred at room temperature for 2 hours, after which the excess acetonitrile was removed and the volume reduced to 10 mL under vacuum. The solution was then stored at -30 °C over night, after which 100 mg of crystalline product were recovered. The volume was then reduced to 3 mL under vacuum and the solution stored at -30 °C over night again, allowing the recovery of other 105 mg of product. From NMR determination it appears that the product crystallised with one molecule of toluene per four molecule of **5a**. Isolated yield = 47%. Crystals of **5a** suitable for single-crystal X-ray diffraction were obtained in C<sub>6</sub>D<sub>6</sub> at room temperature.

Crystal data for C<sub>36</sub>H<sub>36</sub>BF<sub>10</sub>NSi<sub>2</sub>Zr \* C<sub>6</sub>H<sub>6</sub> (**5a**), *M* = 908.98, monoclinic, space group *P*2<sub>1</sub>/*c* (No. 14), *a* = 10.9479(2), *b* = 10.8207(2), *c* = 35.2290(5) Å, *β* = 91.172(1)°, *V* = 4172.49(12) Å<sup>3</sup>, *D*<sub>c</sub> = 1.447 g cm<sup>-3</sup>, *μ* = 0.397 mm<sup>-1</sup>, *Z* = 4, *λ* = 0.71073 Å, *T* = 223(2) K, 34244 reflections collected (*±h*, *±k*, *±l*), [(*sinθ*)/*λ*] = 0.66 Å<sup>-1</sup>, 9312 independent (*R*<sub>int</sub> = 0.050) and 6812 observed reflections [*I* ≥ 2σ(*I*)], 523 refined parameters, *R* = 0.045, *wR*<sup>2</sup> = 0.128. The *R* values are given for the observed reflections [*I* ≥ 2σ(*I*)] and *wR*<sup>2</sup> values are given for all reflections.

<sup>1</sup>H NMR (C<sub>6</sub>D<sub>6</sub>, 500 MHz, 298 K, TMS): δ 5.77(β), 5.47(α), 5.43(β'), 5.33(α') (each m, each 1H, Cp<sup>A</sup>), 5.43(β'), 5.28(α), 5.14(β), 3.81(α') (each m, each 1H, Cp<sup>B</sup>), 3.49 (s, 1H, 2-H), 2.11 (d *J* = 1.4 Hz, 3H, 1-CH<sub>3</sub>), 1.69 (s, 3H, CH<sub>3</sub><sup>A</sup>), 1.62 (s, 3H, CH<sub>3</sub><sup>B</sup>), 0.27 (s, <sup>2</sup>*J*<sub>Si,H</sub> = 6.2 Hz, 9H, 5-Si(CH<sub>3</sub>)<sub>3</sub>), 0.04 (s, <sup>2</sup>*J*<sub>Si,H</sub> = 6.3 Hz, 9H, 3-Si(CH<sub>3</sub>)<sub>3</sub>). <sup>13</sup>C{<sup>1</sup>H} NMR (C<sub>6</sub>D<sub>6</sub>, 126 MHz, 298 K, TMS): δ 183.1(C1), 149.2 (<sup>1</sup>*J*<sub>FC</sub> = 247 Hz), 148.9 (<sup>1</sup>*J*<sub>FC</sub> = 243 Hz) 140.1 (<sup>1</sup>*J*<sub>FC</sub> = 247 Hz) 137.7 (<sup>1</sup>*J*<sub>FC</sub> = 243 Hz) (each dm, C<sub>6</sub>F<sub>5</sub>), 148.6 (C4), 127.2(i), 112.9(α), 112.6(β), 107.9(α'), 107.5(β') (Cp<sup>A</sup>), 126.7(i), 113.8(β'), 111.9(α'), 108.6(α), 106.8(β) (Cp<sup>B</sup>), 97.3 (br, C5), 69.2 (br, C2), 20.7 (d *J* = 6.4 Hz, 1-CH<sub>3</sub>), 17.7 (br, C3), 15.3 (CH<sub>3</sub><sup>A</sup>), 15.2 (CH<sub>3</sub><sup>B</sup>), 2.6 (d *J* = 2.5 Hz, 5-Si(CH<sub>3</sub>)<sub>3</sub>), -0.3 (3-Si(CH<sub>3</sub>)<sub>3</sub>), n.o. (C<sub>6</sub>F<sub>5</sub><sup>i</sup>). <sup>13</sup>C, <sup>1</sup>H GHSQC (C<sub>6</sub>D<sub>6</sub>, 126 / 500 MHz, 298 K, TMS): δ <sup>13</sup>C / <sup>1</sup>H 113.8 / 5.43 (Cp<sup>β,B</sup>), 112.9 / 5.47 (Cp<sup>α,A</sup>), 112.6 / 5.77 (Cp<sup>β,A</sup>), 111.9 / 3.81 (Cp<sup>α,B</sup>), 108.6 / 5.28 (Cp<sup>α,B</sup>), 107.9 / 5.37 (Cp<sup>α,A</sup>), 107.5 / 5.43 (Cp<sup>β,A</sup>), 106.8 / 5.14 (Cp<sup>β,B</sup>), 69.2 / 3.49 (C2, <sup>1</sup>*J*<sub>CH</sub> = 156 Hz), 20.7 / 2.11 (1-CH<sub>3</sub>), 15.3 / 1.69 (CH<sub>3</sub><sup>A</sup>), 15.2 / 1.62 (CH<sub>3</sub><sup>B</sup>), 2.6 / 0.27 (5-Si(CH<sub>3</sub>)<sub>3</sub>), -0.3 / 0.04 (3-Si(CH<sub>3</sub>)<sub>3</sub>). <sup>1</sup>H, <sup>13</sup>C GHMBC (C<sub>6</sub>D<sub>6</sub>, 500 / 126 MHz, 298 K, TMS): δ <sup>1</sup>H / <sup>13</sup>C 5.77 / 127.2, 107.9 (Cp<sup>β,A</sup> / Cp<sup>i,A</sup>, Cp<sup>α,A</sup>), 5.43 / 126.7, 111.9, 108.6 (Cp<sup>β,B</sup> / Cp<sup>i,B</sup>, Cp<sup>α,B</sup>, Cp<sup>α,B</sup>), 5.28 / 113.8, 111.9, 106.8 (Cp<sup>α,B</sup> / Cp<sup>β,B</sup>, Cp<sup>α,B</sup>, Cp<sup>β,B</sup>), 5.14 / 126.7, 111.9 (Cp<sup>β,B</sup> / Cp<sup>i,B</sup>, Cp<sup>α,B</sup>), 3.49 / 148.6, 20.7, 17.7 (2-H / C4, 1-CH<sub>3</sub>, C3), 2.11 / 183.1, 69.2 (1-CH<sub>3</sub> / C1, C2), 1.69 / 127.2, 112.9, 107.9 (CH<sub>3</sub><sup>A</sup> / Cp<sup>i,A</sup>, Cp<sup>α,A</sup>, Cp<sup>α,A</sup>), 1.62 / 126.7, 111.9, 108.6 (CH<sub>3</sub><sup>B</sup> / Cp<sup>i,B</sup>, Cp<sup>α,B</sup>, Cp<sup>α,B</sup>), 0.27 / 97.3 (5-Si(CH<sub>3</sub>)<sub>3</sub> / C5), 0.04 / 17.7 (3-Si(CH<sub>3</sub>)<sub>3</sub> / C3). <sup>29</sup>Si{<sup>1</sup>H} NMR (C<sub>6</sub>D<sub>6</sub>, 99 MHz, 298 K, TMS): δ 4.2 (3-Si), -8.0 (5-Si). <sup>29</sup>Si, <sup>1</sup>H GHMQC (C<sub>6</sub>D<sub>6</sub>, 99 / 500 MHz, 298 K, TMS): δ <sup>29</sup>Si / <sup>1</sup>H 4.2 / 3.49, 0.04 (3-Si / 2-H, 3-Si(CH<sub>3</sub>)<sub>3</sub>), -8.0 / 0.27 (5-Si / 5-Si(CH<sub>3</sub>)<sub>3</sub>). <sup>11</sup>B{<sup>1</sup>H} NMR (C<sub>6</sub>D<sub>6</sub>, 161 MHz, 298 K, BF<sub>3</sub>·OEt<sub>2</sub>): δ -15.6 (s, *v*<sub>1/2</sub> ≈ 30 Hz). <sup>19</sup>F NMR (C<sub>6</sub>D<sub>6</sub>, 470 MHz, 298 K, CFCI<sub>3</sub>): -124.0, -128.4 (each m, each 1F, *o*-F), -158.9 (m, 1F, *p*-F), -163.7, -164.5 (each m, each 1F, *m*-F) (C<sub>6</sub>F<sub>5</sub>), n.o. (*o*-F), -158.7 (m, 1F, *p*-F), -164.1 (br, 2F, *m*-F) (C<sub>6</sub>F<sub>5</sub>). [Cp<sup>A</sup> is in a cis position to 3-SiMe<sub>3</sub>].

$^1\text{H}$  NMR ( $\text{C}_7\text{D}_8$ , 500 MHz, 243 K, TMS):  $\delta$  5.68( $\beta$ ), 5.38( $\alpha$ ), 5.28( $\beta'$ ), 5.17( $\alpha'$ ) (each m, each 1H,  $\text{Cp}^{\text{A}}$ ), 5.40( $\beta'$ ), 5.12( $\alpha$ ), 5.00( $\beta$ ), 3.52( $\alpha'$ ) (each m, each 1H,  $\text{Cp}^{\text{B}}$ ), 3.42 (s, 1H, 2-H), 2.03 (s, 3H, 1- $\text{CH}_3$ ), 1.58 (s, 3H,  $\text{CH}_3^{\text{A}}$ ), 1.51 (s, 3H,  $\text{CH}_3^{\text{B}}$ ), 0.18 (s, 9H, 5- $\text{Si}(\text{CH}_3)_3$ ), -0.02 (s, 9H, 3- $\text{Si}(\text{CH}_3)_3$ ).  $^{13}\text{C}\{^1\text{H}\}$  NMR ( $\text{C}_7\text{D}_8$ , 126 MHz, 243 K, TMS):  $\delta$  182.9 (C1), 149.0 ( $^1J_{\text{FC}} = 256$  Hz), 148.8 ( $^1J_{\text{FC}} = 244$  Hz), 148.2 ( $^1J_{\text{FC}} = 238$  Hz), 139.8 ( $^1J_{\text{FC}} = 244$  Hz), 137.4 ( $^1J_{\text{FC}} = 247$  Hz) (each dm,  $\text{C}_6\text{F}_5$ ), 146.9 (C4), 127.5(i), 112.9 ( $^1J_{\text{CH}} = 175$  Hz,  $\alpha$ ), 112.6 ( $^1J_{\text{CH}} = 174$  Hz,  $\beta$ ), 107.3 ( $^1J_{\text{CH}} = 174$  Hz,  $\alpha'$ ), 107.1 ( $^1J_{\text{CH}} = 176$  Hz,  $\beta'$ ) ( $\text{Cp}^{\text{A}}$ ), 126.8(i), 114.0 ( $^1J_{\text{CH}} = 177$  Hz,  $\beta'$ ), 111.6 ( $^1J_{\text{CH}} = 175$  Hz,  $\alpha'$ ), 108.1 ( $^1J_{\text{CH}} = 174$  Hz,  $\alpha$ ), 106.4 ( $^1J_{\text{CH}} = 175$  Hz,  $\beta$ ) ( $\text{Cp}^{\text{B}}$ ), 97.4 (br., C5), 68.8 (br.,  $^1J_{\text{CH}} = 156$  Hz, C2), 20.5 ( $^1J_{\text{CH}} = 129$  Hz, 1- $\text{CH}_3$ ), 17.2 (br., C3), 15.3 ( $^1J_{\text{CH}} = 129$  Hz,  $\text{CH}_3^{\text{A}}$ ), 15.1 ( $^1J_{\text{CH}} = 129$  Hz,  $\text{CH}_3^{\text{B}}$ ), 2.4 (d  $J = 2.4$  Hz,  $^1J_{\text{CH}} = 119$  Hz, 5- $\text{Si}(\text{CH}_3)_3$ ), -0.3 ( $^1J_{\text{CH}} = 118$  Hz, 3- $\text{Si}(\text{CH}_3)_3$ ), n.o. ( $\text{C}_6\text{F}_5$ ).  $^{13}\text{C}, ^1\text{H}$  GHSQC ( $\text{C}_6\text{D}_6$ , 126 / 500 MHz, 243 K, TMS):  $\delta$   $^{13}\text{C} / ^1\text{H}$  114.0 / 5.40 ( $\text{Cp}^{\beta,\text{B}}$ ), 112.9 / 5.38 ( $\text{Cp}^{\alpha,\text{A}}$ ), 112.6 / 5.68 ( $\text{Cp}^{\beta,\text{A}}$ ), 111.6 / 3.52 ( $\text{Cp}^{\alpha,\text{B}}$ ), 108.1 / 5.12 ( $\text{Cp}^{\alpha,\text{B}}$ ), 107.3 / 5.17 ( $\text{Cp}^{\alpha,\text{A}}$ ), 107.1 / 5.28 ( $\text{Cp}^{\beta,\text{A}}$ ), 106.4 / 5.00 ( $\text{Cp}^{\beta,\text{B}}$ ), 68.8 / 3.42 (C2), 20.5 / 2.03 (1- $\text{CH}_3$ ), 15.3 / 1.58 ( $\text{CH}_3^{\text{A}}$ ), 15.1 / 1.51 ( $\text{CH}_3^{\text{B}}$ ), 2.4 / 0.18 (5- $\text{Si}(\text{CH}_3)_3$ ), -0.3 / -0.02 (3- $\text{Si}(\text{CH}_3)_3$ ).  $^1\text{H}, ^{13}\text{C}$  GHMBC ( $\text{C}_6\text{D}_6$ , 500 / 126 MHz, 298 K, TMS):  $\delta$   $^1\text{H} / ^{13}\text{C}$  5.68 / 127.5, 112.9, 107.1 ( $\text{Cp}^{\beta,\text{A}} / \text{Cp}^{\text{i,A}}$ ,  $\text{Cp}^{\alpha,\text{A}}$ ,  $\text{Cp}^{\beta,\text{A}}$ ), 5.40 / 126.8, 111.6, 108.1 ( $\text{Cp}^{\beta,\text{B}} / \text{Cp}^{\text{i,B}}$ ,  $\text{Cp}^{\alpha,\text{B}}$ ,  $\text{Cp}^{\alpha,\text{B}}$ ), 5.38 / 127.5, 112.6, 107.1 ( $\text{Cp}^{\alpha,\text{A}} / \text{Cp}^{\text{i,A}}$ ,  $\text{Cp}^{\beta,\text{A}}$ ,  $\text{Cp}^{\beta,\text{A}}$ ), 5.28 / 127.5, 112.9, 107.3 ( $\text{Cp}^{\beta,\text{A}} / \text{Cp}^{\text{i,A}}$ ,  $\text{Cp}^{\alpha,\text{A}}$ ,  $\text{Cp}^{\alpha,\text{A}}$ ), 5.17 / 127.5, 112.6, 107.1 ( $\text{Cp}^{\alpha,\text{A}} / \text{Cp}^{\text{i,A}}$ ,  $\text{Cp}^{\beta,\text{A}}$ ,  $\text{Cp}^{\beta,\text{A}}$ ), 5.12 / 126.8, 114.0, 111.6, 106.4 ( $\text{Cp}^{\alpha,\text{B}} / \text{Cp}^{\text{i,B}}$ ,  $\text{Cp}^{\beta,\text{B}}$ ,  $\text{Cp}^{\alpha,\text{B}}$ ,  $\text{Cp}^{\beta,\text{B}}$ ), 5.00 / 126.8, 114.0, 111.6 ( $\text{Cp}^{\beta,\text{B}} / \text{Cp}^{\text{i,B}}$ ,  $\text{Cp}^{\beta,\text{B}}$ ,  $\text{Cp}^{\alpha,\text{B}}$ ), 3.52 / 126.8, 108.1, 106.4 ( $\text{Cp}^{\alpha,\text{B}} / \text{Cp}^{\text{i,B}}$ ,  $\text{Cp}^{\alpha,\text{B}}$ ,  $\text{Cp}^{\beta,\text{B}}$ ), 3.42 / 146.9, 97.4, 20.5, 17.2 (2-H / C4, C5, 1- $\text{CH}_3$ , C3), 2.03 / 182.9, 68.8 (1- $\text{CH}_3$  / C1, C2), 1.58 / 127.5, 112.9, 107.3 ( $\text{Cp}^{\text{A}} / \text{Cp}^{\text{i,A}}$ ,  $\text{Cp}^{\alpha,\text{A}}$ ,  $\text{Cp}^{\alpha,\text{A}}$ ), 1.51 / 126.9, 111.6, 108.1 ( $\text{Cp}^{\text{B}} / \text{Cp}^{\text{i,B}}$ ,  $\text{Cp}^{\alpha,\text{B}}$ ,  $\text{Cp}^{\alpha,\text{B}}$ ), 0.18 / 146.9, 97.4 (5- $\text{Si}(\text{CH}_3)_3$  / C5, C4), -0.02 / 17.2 (3- $\text{Si}(\text{CH}_3)_3$  / C3).  $^{11}\text{B}\{^1\text{H}\}$  NMR ( $\text{C}_7\text{D}_8$ , 160 MHz, 298 K,  $\text{BF}_3 \cdot \text{OEt}_2$ ):  $\delta$  -16.0 (s,  $\nu_{1/2} \approx 70$  Hz).  $^{29}\text{Si}\{^1\text{H}\}$  NMR ( $\text{C}_7\text{D}_8$ , 99 MHz, 243 K, TMS):  $\delta$  4.2 (3-Si), -8.2 (5-Si).  $^{29}\text{Si}, ^1\text{H}$  GHMQC ( $\text{C}_7\text{D}_8$ , 99 / 500 MHz, 243 K, TMS):  $\delta$   $^{29}\text{Si} / ^1\text{H}$  4.2 / 3.42, -0.02 (3-Si / 2-H, 3- $\text{Si}(\text{CH}_3)_3$ ), -8.2 / 0.18 (5-Si / 5- $\text{Si}(\text{CH}_3)_3$ ).  $^{19}\text{F}$  NMR ( $\text{C}_7\text{D}_8$ , 470 MHz, 243 K,  $\text{CFCl}_3$ ): -124.3, -128.5 (each m, each 1F, *o*-F), -158.5 (m, 1F, *p*-F), -163.5, -164.1 (each m, each 1F, *m*-F) ( $\text{C}_6\text{F}_5$ ), 126.9, -132.7 (each br, each 1F, *o*-F), -158.2 (m, 1F, *p*-F), -163.5 (m), -163.8 (br) (each 1F, *m*-F) ( $\text{C}_6\text{F}_5$ ). [ $\text{Cp}^{\text{A}}$  is in a *cis* position to 3- $\text{SiMe}_3$ ].  
Elemental analysis:  $\text{C}_{36}\text{H}_{36}\text{NBF}_{10}\text{Si}_2\text{Zr} \cdot 1/4\text{C}_7\text{H}_8$ , calc.: C = 53.10%, H = 4.49%, N = 1.64%; measured: C = 52.66%, H = 4.61%, N = 1.70%.  
FT-IR (KBr,  $\text{cm}^{-1}$ , selected bands): 3688, 3477, 2956, 1909, 1647, 1517, 1472, 1392, 1304, 1287, 1248, 1127, 1094, 1037.  
MS (GC-EI, *m/z*): 829.3 [M], 750.2 [M -  $\text{C}_5\text{H}_4(\text{CH}_3)$ ], 248.1 [ $\text{Zr}(\text{C}_5\text{H}_4(\text{CH}_3))_2$ ].

### Generation of complex 5b.

Complex **3a** (50.7 mg, 0.064 mmol) and 2,2'-dimethylpropionitrile (5.3 mg, 0.064 mmol) were mixed in a small phial in an argon-filled glove-box, and dissolved by 0.8 mL C<sub>6</sub>D<sub>6</sub>. The dark-red clear solution was placed into a NMR tube, which was then sealed under vacuum and measured.

<sup>1</sup>H NMR (C<sub>6</sub>D<sub>6</sub>, 500 MHz, 298 K, TMS): δ 5.70(β'), 5.67(α), 5.54(β), 5.48(α') (each m, each 1H, Cp<sup>A</sup>), 5.31(α), 5.15(β), 5.02(β'), 4.71(α') (each m, each 1H, Cp<sup>B</sup>), 3.51 (s, 1H, 2-H), 1.76 (s, 3H, CH<sub>3</sub><sup>A</sup>), 1.63 (s, 3H, CH<sub>3</sub><sup>B</sup>), 1.23 (s, 9H, C(CH<sub>3</sub>)<sub>3</sub>), 0.36 (s, 9H, 5-Si(CH<sub>3</sub>)<sub>3</sub>), 0.05 (s, 9H, 3-Si(CH<sub>3</sub>)<sub>3</sub>). <sup>13</sup>C{<sup>1</sup>H} NMR (C<sub>6</sub>D<sub>6</sub>, 126 MHz, 298 K, TMS): δ 196.8 (C1), 149.0 (<sup>1</sup>J<sub>FC</sub> = 245 Hz), 148.6 (<sup>1</sup>J<sub>CF</sub> = 243 Hz), 140.0 (<sup>1</sup>J<sub>FC</sub> = 250 Hz), 137.6 (<sup>1</sup>J<sub>FC</sub> = 250 Hz) (each dm, C<sub>6</sub>F<sub>5</sub>), 147.4 (C4), 123.7(i), 114.0(β'), 113.9(α'), 111.1(α), 108.8(β) (Cp<sup>B</sup>), 123.4(i), 113.7(β'), 112.5(α), 111.9(α'), 110.0(β) (Cp<sup>A</sup>), 115.4 (C5), 63.5 (br., C2), 38.6 (C(CH<sub>3</sub>)<sub>3</sub>), 29.5 (d J = 2.0 Hz, C(CH<sub>3</sub>)<sub>3</sub>), 23.6 (br., C3), 15.1 (CH<sub>3</sub><sup>A</sup>), 15.0 (CH<sub>3</sub><sup>B</sup>), 3.0 (d J = 2.7 Hz, 5-Si(CH<sub>3</sub>)<sub>3</sub>), 0.5 (3-Si(CH<sub>3</sub>)<sub>3</sub>), n.o. (C<sub>6</sub>F<sub>5</sub><sup>i</sup>). <sup>13</sup>C, <sup>1</sup>H GHSQC (C<sub>6</sub>D<sub>6</sub>, 126 / 500 MHz, 298 K, TMS): δ <sup>13</sup>C / <sup>1</sup>H 113.7 / 5.70 (Cp<sup>β,A</sup>), 112.5 / 5.67 (Cp<sup>α,A</sup>), 110.0 / 5.54 (Cp<sup>β,A</sup>), 111.9 / 5.48 (Cp<sup>α,A</sup>), 114.0 / 5.02 (Cp<sup>β,B</sup>), 113.9 / 4.71 (Cp<sup>α,B</sup>), 111.1 / 5.31 (Cp<sup>α,B</sup>), 108.8 / 5.15 (Cp<sup>β,B</sup>), 63.5 / 3.51 (C2), 15.1 / 1.76 (CH<sub>3</sub><sup>A</sup>), 15.0 / 1.63 (CH<sub>3</sub><sup>B</sup>), 29.5 / 1.23 (C(CH<sub>3</sub>)<sub>3</sub>), 3.0 / 0.36 (5-Si(CH<sub>3</sub>)<sub>3</sub>), 0.5 / 0.05 (3-Si(CH<sub>3</sub>)<sub>3</sub>). <sup>1</sup>H, <sup>13</sup>C GHMBC (C<sub>6</sub>D<sub>6</sub>, 500 / 126 MHz, 298 K, TMS): δ <sup>1</sup>H / <sup>13</sup>C 5.70 / 123.4, 112.5 (Cp<sup>β,A</sup> / Cp<sup>i,A</sup>, Cp<sup>α,A</sup>), 5.67 / 113.7, 111.9 (Cp<sup>β,A</sup> / Cp<sup>β,A</sup>, Cp<sup>α,A</sup>), 5.54 / 123.4, 111.9 (Cp<sup>β,A</sup> / Cp<sup>i,A</sup>, Cp<sup>α,A</sup>), 5.48 / 112.5, 110.0 (Cp<sup>α,A</sup> / Cp<sup>α,A</sup>, Cp<sup>β,A</sup>), 5.31 / 113.9, 108.8 (Cp<sup>α,B</sup> / Cp<sup>α,B</sup>, Cp<sup>β,B</sup>), 5.15 / 123.7, 114.0, 111.1 (Cp<sup>β,B</sup> / Cp<sup>i,B</sup>, Cp<sup>β,B</sup>, Cp<sup>α,B</sup>), 5.02 / 123.7, 113.9, 111.1 (Cp<sup>β,B</sup> / Cp<sup>i,B</sup>, Cp<sup>α,B</sup>, Cp<sup>α,B</sup>), 4.71 / 114.0, 111.1, 108.8 (Cp<sup>α,B</sup> / Cp<sup>β,B</sup>, Cp<sup>α,B</sup>, Cp<sup>β,B</sup>), 3.51 / 147.4, 115.4, 38.6, 23.6 (2-H / C4, C5, C(CH<sub>3</sub>)<sub>3</sub>, C3), 1.76 / 123.4, 112.5, 111.9 (CH<sub>3</sub><sup>A</sup> / Cp<sup>i,A</sup>, Cp<sup>α,A</sup>, Cp<sup>α,A</sup>), 1.63 / 123.7, 113.9, 111.1 (CH<sub>3</sub><sup>B</sup> / Cp<sup>i,B</sup>, Cp<sup>α,B</sup>, Cp<sup>α,B</sup>), 1.23 / 196.8, 38.6 (C(CH<sub>3</sub>)<sub>3</sub> / C1, C(CH<sub>3</sub>)<sub>3</sub>), 0.36 / 147.4, 115.4 (5-Si(CH<sub>3</sub>)<sub>3</sub> / C4, C5), 0.05 / 23.6 (3-Si(CH<sub>3</sub>)<sub>3</sub> / C3). <sup>11</sup>B{<sup>1</sup>H} NMR (C<sub>6</sub>D<sub>6</sub>, 160 MHz, 298 K, BF<sub>3</sub>·OEt<sub>2</sub>): δ -13.0 (s, ν<sub>1/2</sub> ≈ 35 Hz). <sup>29</sup>Si{<sup>1</sup>H} NMR (C<sub>6</sub>D<sub>6</sub>, 99 MHz, 298 K, TMS): δ 3.3 (3-Si), -8.5 (5-Si). <sup>29</sup>Si, <sup>1</sup>H GHMQC (C<sub>7</sub>D<sub>8</sub>, 99 / 500 MHz, 243 K, TMS): δ <sup>29</sup>Si / <sup>1</sup>H 3.3 / 3.51, 0.05 (3-Si / 2-H, 3-Si(CH<sub>3</sub>)<sub>3</sub>), -8.5 / 0.36 (5-Si / 5-Si(CH<sub>3</sub>)<sub>3</sub>). <sup>19</sup>F NMR (C<sub>6</sub>D<sub>6</sub>, 470 MHz, 298 K, CFCI<sub>3</sub>): -123.4, -126.5 (each m, each 1F, o-F), -158.9 (m, 1F, p-F), -163.2, -164.1 (each m, each 1F, m-F) (C<sub>6</sub>F<sub>5</sub>), -128.9 (br, 2F, o-F), -158.8 (m, 1F, p-F), -164.1 (m, 2F, m-F) (C<sub>6</sub>F<sub>5</sub>). [Cp<sup>A</sup> is in a cis position to 3-SiMe<sub>3</sub>].

**Optimized structure (TPSS-D/def2-TZVP)**  
of **5a** in cartesian coordinates (Bohr):

|                    |                    |                   |    |
|--------------------|--------------------|-------------------|----|
| 5.02836109668281   | 3.77520389294929   | -2.61474073501246 | c  |
| 6.05320333695463   | 2.09740684128607   | -4.43523762730218 | c  |
| 8.20113080228110   | 0.92605537502291   | -3.31926823898264 | c  |
| 8.55218709002271   | 1.95794480658783   | -0.85265724935881 | c  |
| 6.58162438714389   | 3.71303320665889   | -0.41970857620036 | c  |
| 4.56455355195638   | -0.59547930019604  | -0.71033885108939 | zr |
| 3.46755320791492   | -4.96385397743316  | 0.76058896199182  | c  |
| 5.27814134257359   | -5.29220201625862  | -1.19893177720468 | c  |
| 7.58627214652014   | -4.23821634446912  | -0.32307939818675 | c  |
| 7.20903809009432   | -3.29844912260445  | 2.17333039424027  | c  |
| 4.65411940273846   | -3.76180557334108  | 2.84126077171305  | c  |
| 4.79160933582855   | -6.53533997365291  | -3.70147465102200 | c  |
| 5.05400252661865   | 1.65429517725197   | -7.04921615020480 | c  |
| 0.06918003512398   | 1.18506789029199   | 0.78880674119626  | c  |
| 1.90334690541940   | 1.37346439015664   | 2.29636291870449  | c  |
| 2.99478445711557   | 2.56363795183303   | 5.38462880402690  | si |
| 2.81094119947683   | 6.12565705613310   | 5.31024432824268  | c  |
| 1.71212869756157   | -1.19063958158884  | -3.11528672665650 | n  |
| -0.36497698729436  | -0.96775458624725  | -4.30079225486904 | c  |
| -0.71386151322497  | -1.90247864796642  | -6.98493455295625 | c  |
| -2.24855101925297  | 1.42145236784052   | -0.50430091150146 | c  |
| -3.51884379259704  | 4.72640007193850   | 0.01894779503193  | si |
| -6.45240609683593  | 5.25092041468410   | -1.92742115608381 | c  |
| -2.57773938711964  | 0.20442351226671   | -3.11810046913693 | c  |
| -4.06772839241972  | -1.10870189422252  | -0.81611089491833 | b  |
| -3.12292751834975  | -3.71063480817123  | 0.41809992161859  | c  |
| -2.50227177031432  | -3.99234417404422  | 2.96882169731734  | c  |
| -1.86311126923049  | -6.30889080276086  | 4.05122273967884  | c  |
| -1.83408392415783  | -8.47579423025137  | 2.55763760919197  | c  |
| -2.43689159490117  | -8.29052308577914  | -0.00092688972046 | c  |
| -3.06926930645436  | -5.93638712550644  | -0.99714672548696 | c  |
| -2.47721965731142  | -1.97461167705643  | 4.52908050629398  | f  |
| -1.21535090863222  | -6.46473798148806  | 6.51023319988116  | f  |
| -1.17601273578180  | -10.71322151172077 | 3.55782808730535  | f  |
| -2.36946964339097  | -10.36908650681990 | -1.46855092610070 | f  |
| -3.65702087942645  | -5.85700558343332  | -3.49082563836806 | f  |
| -7.08730006103724  | -0.75326487311492  | -0.84783570811736 | c  |
| -8.47093515928836  | -0.29674476783370  | 1.35182109520595  | c  |
| -11.05862492406628 | 0.17830676209519   | 1.38202711751823  | c  |
| -12.39151852580383 | 0.15432937450707   | -0.89022691537661 | c  |
| -11.11312807505631 | -0.36211873210111  | -3.13273400820649 | c  |
| -8.51909311790735  | -0.81818276700997  | -3.06578864143932 | c  |
| -7.26533821244149  | -0.25491032511991  | 3.60894702215324  | f  |

|                    |                   |                     |
|--------------------|-------------------|---------------------|
| -12.28328981330029 | 0.65786403588586  | 3.56089557825828 f  |
| -14.89041216444610 | 0.59932699958665  | -0.91345549428143 f |
| -12.39703932577158 | -0.41653990124502 | -5.32939740565050 f |
| -7.40531889511415  | -1.32012379067037 | -5.32059382065753 f |
| -4.16784837922583  | 5.14051432841341  | 3.48700495249063 c  |
| -0.98595304730373  | 7.02478994681582  | -0.99381199047733 c |
| 6.36771075089018   | 1.60171419354998  | 6.01172059405419 c  |
| 0.91896582538596   | 1.28805033038334  | 7.96863192877660 c  |
| -3.79725909220741  | 1.21509115138156  | -4.42879297582517 h |
| -0.96737922679029  | -0.27237113660247 | -8.24269113780366 h |
| -2.42843619823268  | -3.05304635531382 | -7.09746709268868 h |
| 0.92825472968963   | -2.99109441537315 | -7.59989639238616 h |
| -2.56333925239536  | 4.44275237956017  | 4.59978449120849 h  |
| -5.83953818280460  | 4.07317208667668  | 4.07825537493739 h  |
| -4.46198144352557  | 7.13764051894752  | 3.97030603153455 h  |
| -0.56350575173316  | 6.83676246071163  | -3.01785262773807 h |
| 0.76217294365996   | 6.67717279153289  | 0.06616823085898 h  |
| -1.55981728873004  | 8.98958917884615  | -0.65048816422787 h |
| -6.92773535218333  | 7.27269597383517  | -1.93536241646706 h |
| -8.07759923191966  | 4.21049008099507  | -1.17723838336311 h |
| -6.18121836645051  | 4.66596670449048  | -3.89921869006047 h |
| 6.51156960135060   | -0.40410834376427 | 6.50892616480416 h  |
| 7.11155984498506   | 2.69846712512565  | 7.61020478106346 h  |
| 7.59709041540471   | 1.94417691997725  | 4.37849758228445 h  |
| -1.05779905128283  | 1.84001081630067  | 7.68537452428607 h  |
| 1.54323158459665   | 2.01462976230215  | 9.81152719853698 h  |
| 0.97588962804553   | -0.78253650726799 | 8.03374494264681 h  |
| 4.03965907105464   | 6.95291438983197  | 3.85900301044083 h  |
| 3.39369282524544   | 6.90399693659236  | 7.14558869550318 h  |
| 0.87662653938924   | 6.76173606808869  | 4.92918436337608 h  |
| 9.33715585921336   | -4.16237572728029 | -1.37800201473882 h |
| 8.61146513273003   | -2.37133683296601 | 3.33404241875295 h  |
| 3.74242979716068   | -3.23177978027429 | 4.59137824291977 h  |
| 1.50342493961670   | -5.48122334263463 | 0.61697636697597 h  |
| 6.04632717147740   | -5.78641618953941 | -5.16824502442697 h |
| 2.83330088560682   | -6.22530238257142 | -4.28680612181751 h |
| 5.11620811732216   | -8.58077630882106 | -3.56538328770118 h |
| 9.39262023143263   | -0.47012025236996 | -4.22213450657233 h |
| 10.02668477709620  | 1.44168400615199  | 0.46725963649690 h  |
| 6.26995283909066   | 4.77317915229249  | 1.29785936080752 h  |
| 3.31443164385859   | 4.86636893943861  | -2.83474730987974 h |
| 3.01108653804122   | 1.95876147557463  | -7.10581442515812 h |
| 5.43955730856558   | -0.27816671967886 | -7.67888050436424 h |
| 5.94589792277630   | 2.96358011177187  | -8.39030872253782 h |
